# Supplementary material for: Identification of BLNK and BTK as mediators of rituximab‐induced programmed cell death by CRISPR screens in GCB‐subtype diffuse large B‐cell lymphoma
Source: PubMed Central journal article supplement (PMC7463323; doi:10.1002/1878-0261.12753), 2020-07-16

# Supplemental figure S1

**A**

pCCL/PGK-eGFP

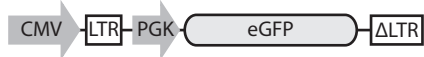

pLentiCRISPR V2

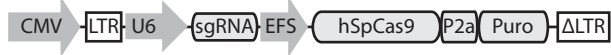

**B**

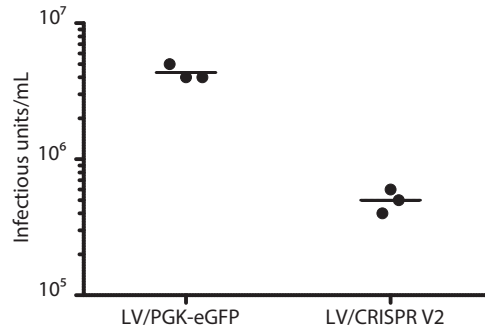

**C**

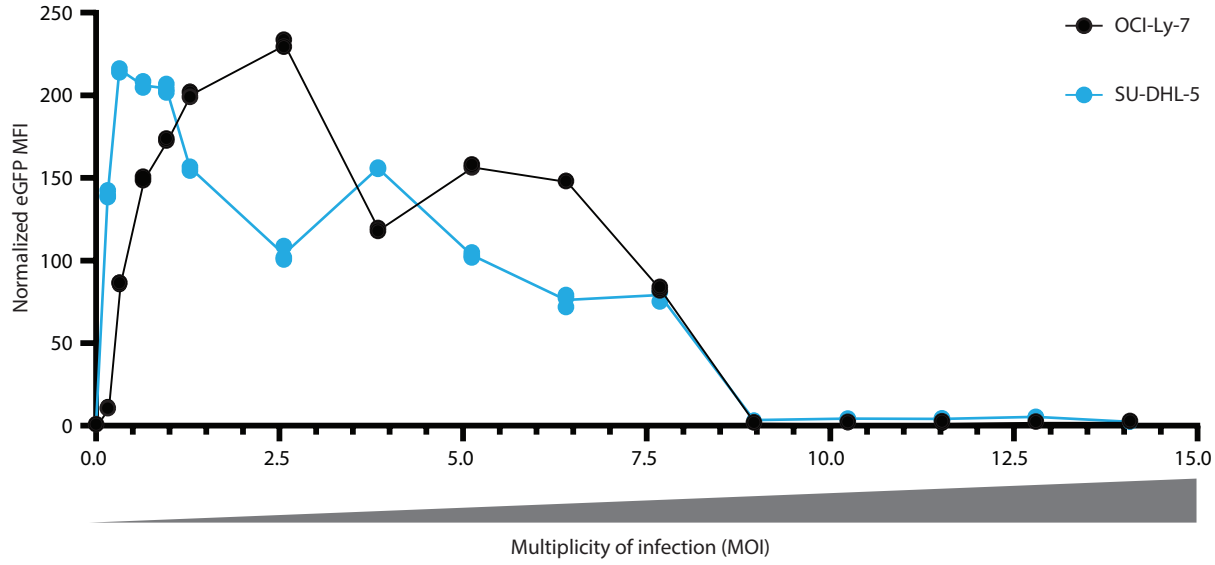

**D**

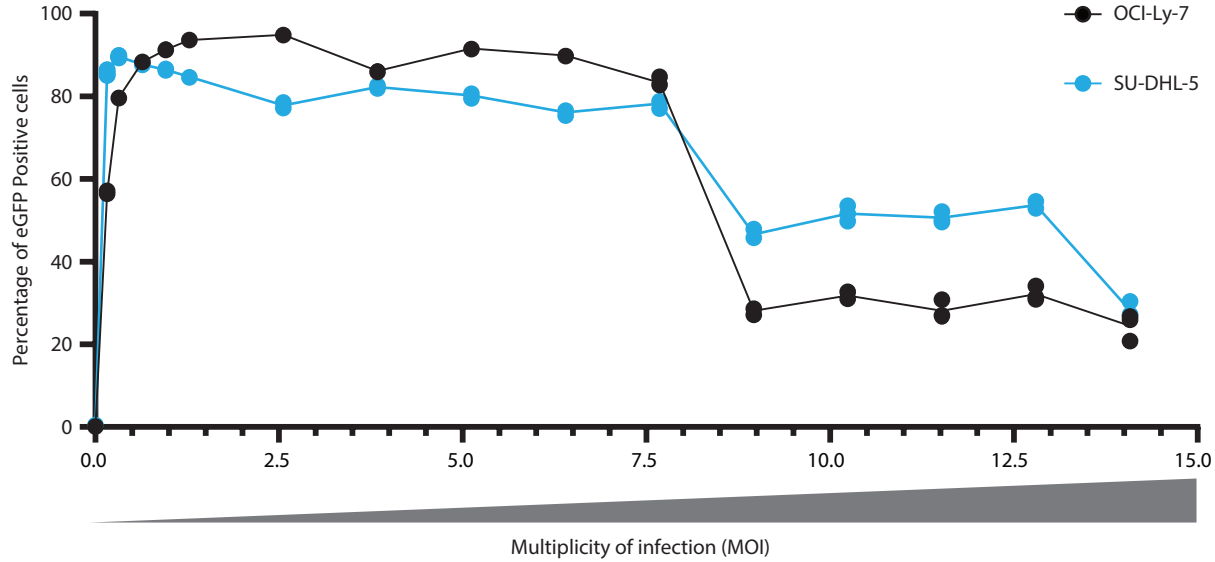

Supplemental figure S2

A

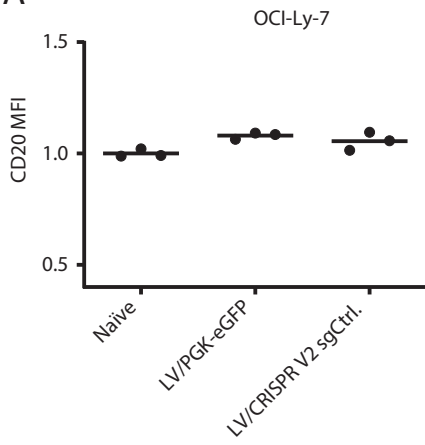

B

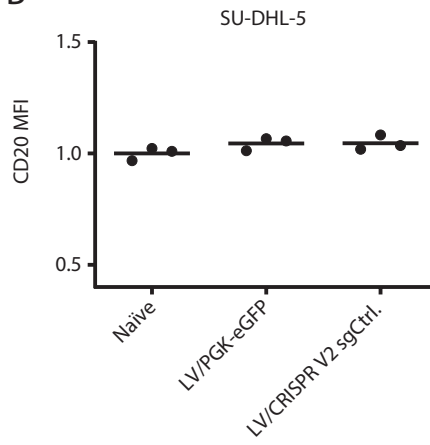

C

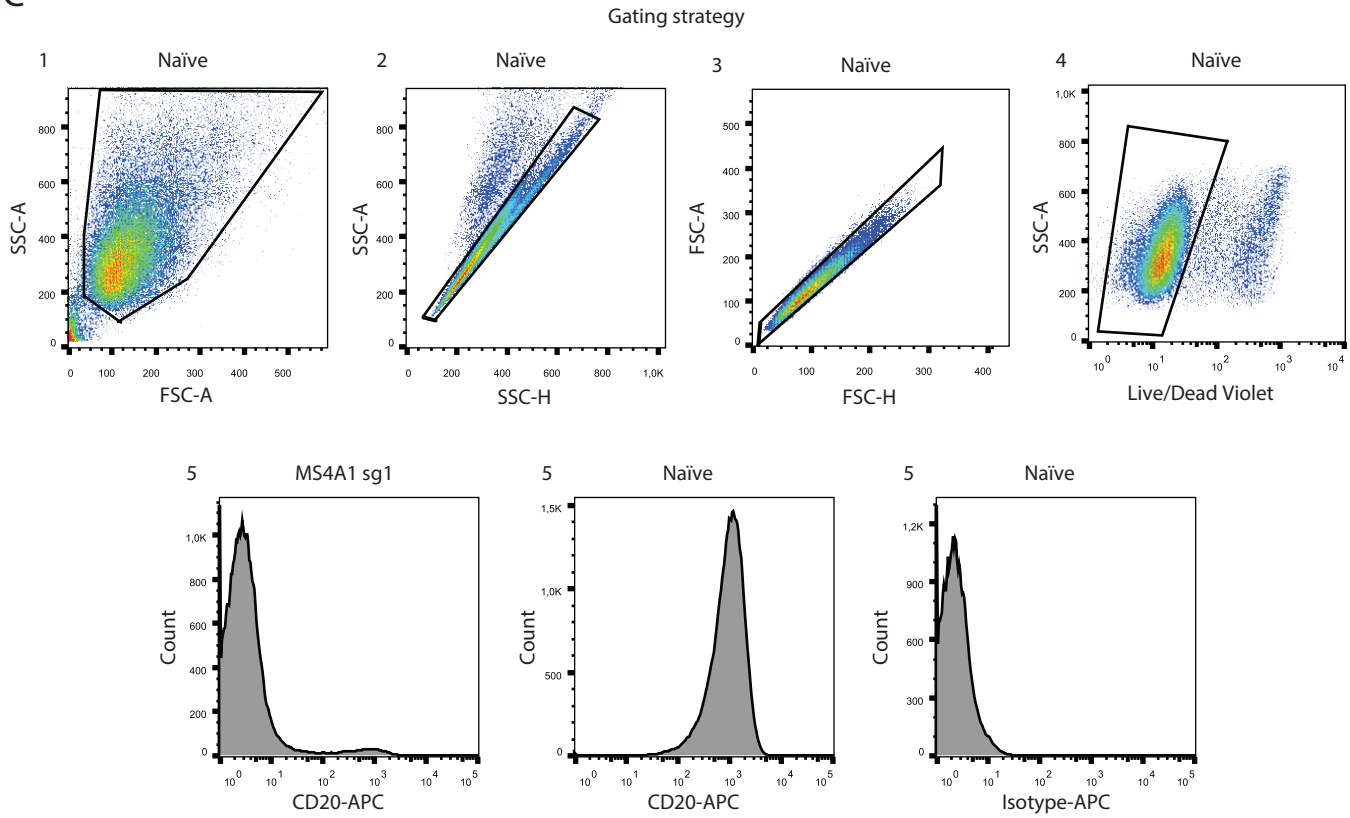

Supplemental figure S3

A

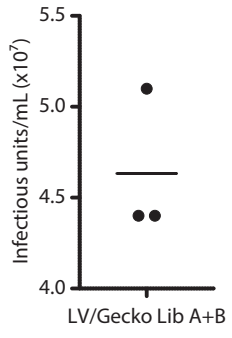

B

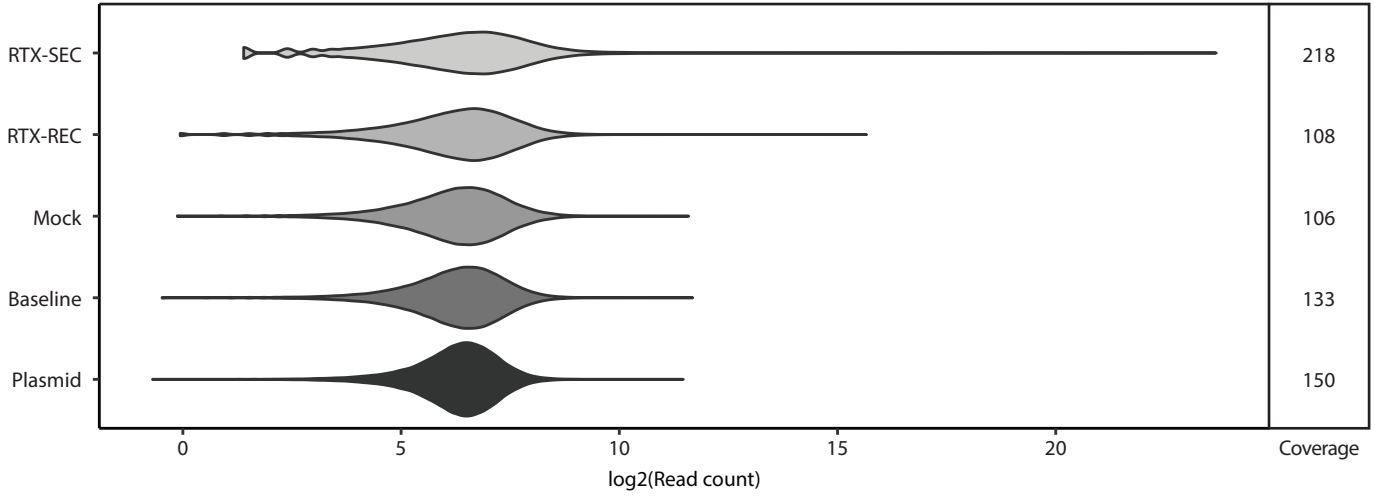

Supplemental figure S4

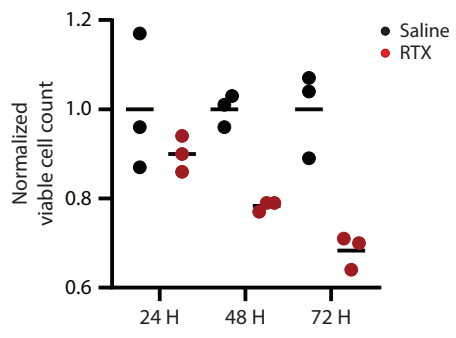

Supplemental figure S5

A

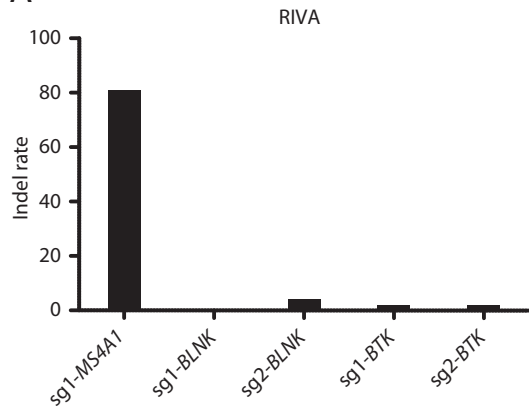

# Supplemental figure S6

## A

pCCL/PGK-MS4A1

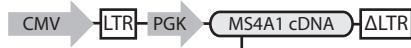

pLX\_311-KRAB-dCas9

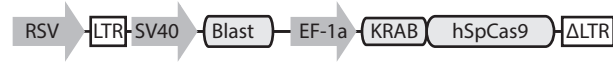

Wild type CDS sequence

PAM  
TTGCCCTGGGGGGTCTCTGATGATCCC

MS4A1 sgRNA 1 recognition site

Vector CDS sequence

TTGCGCTGGGGGGCTGCTGATGATCCC

sgRNA silenced

Silent mutations

abolishing sgRNA binding

## B

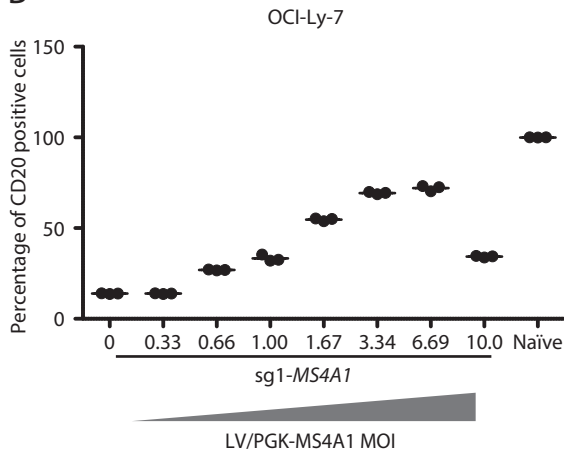

## C

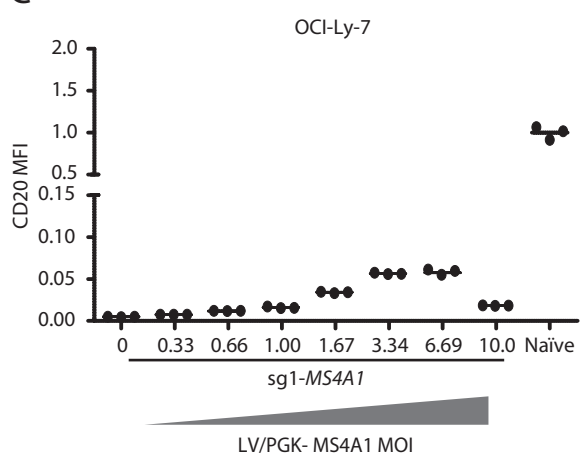

## D

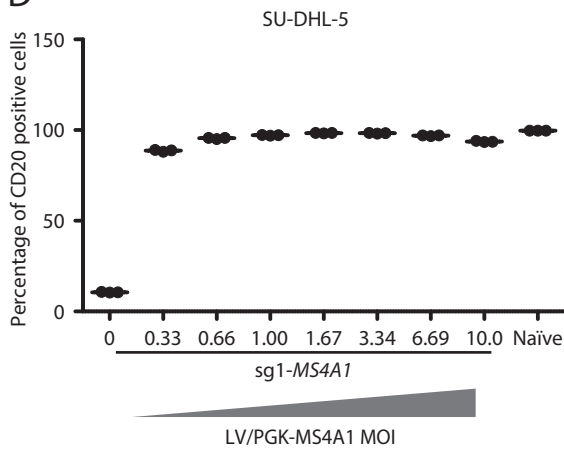

## E

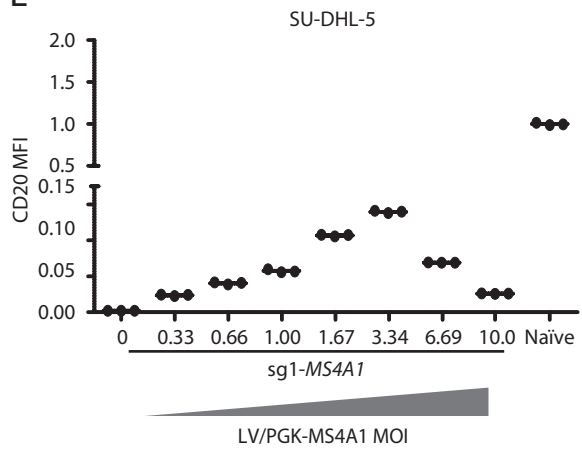

Supplemental figure S7

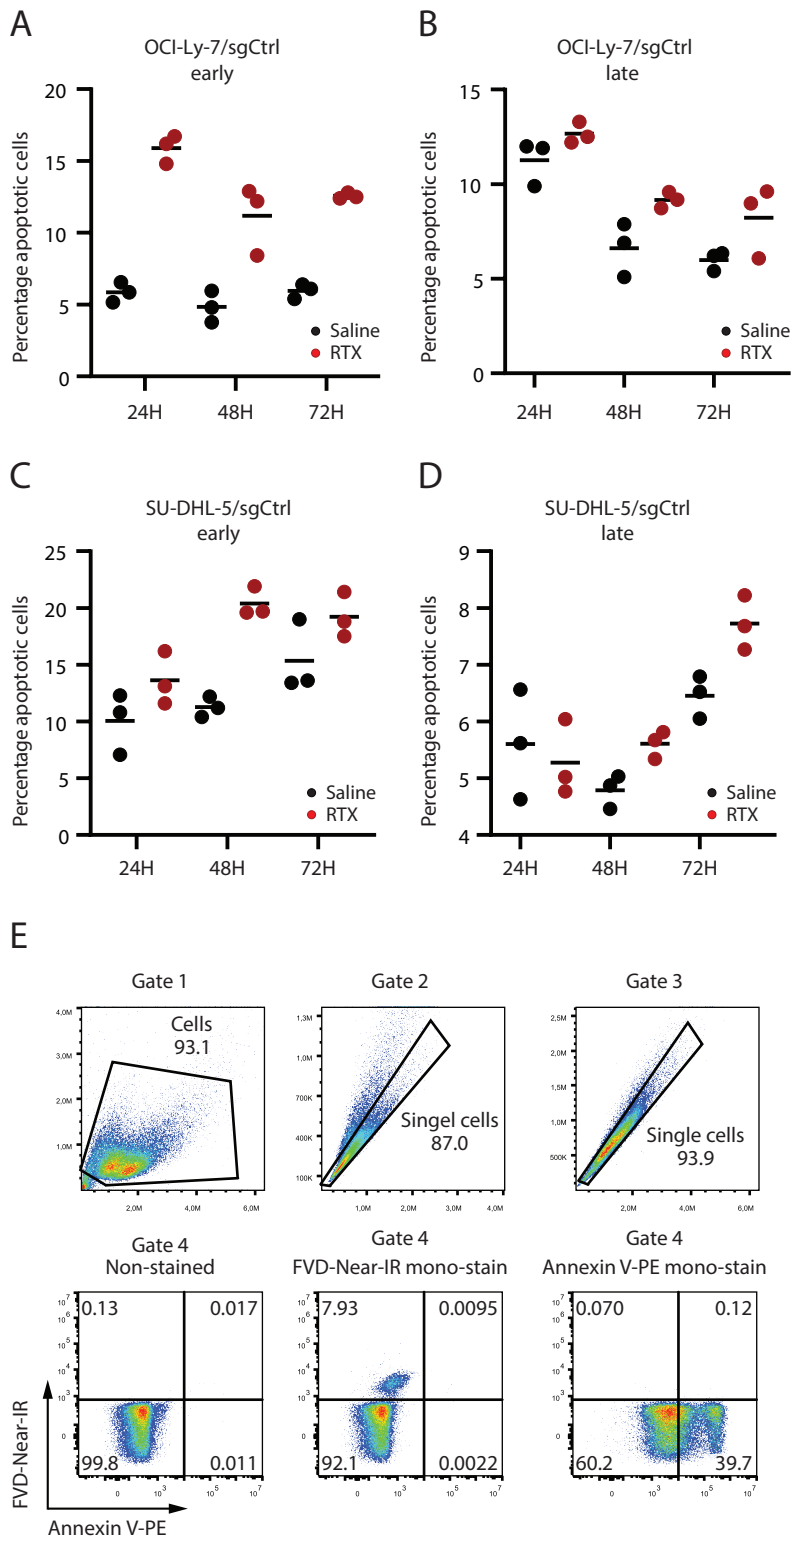

Supplemental figure S8

A

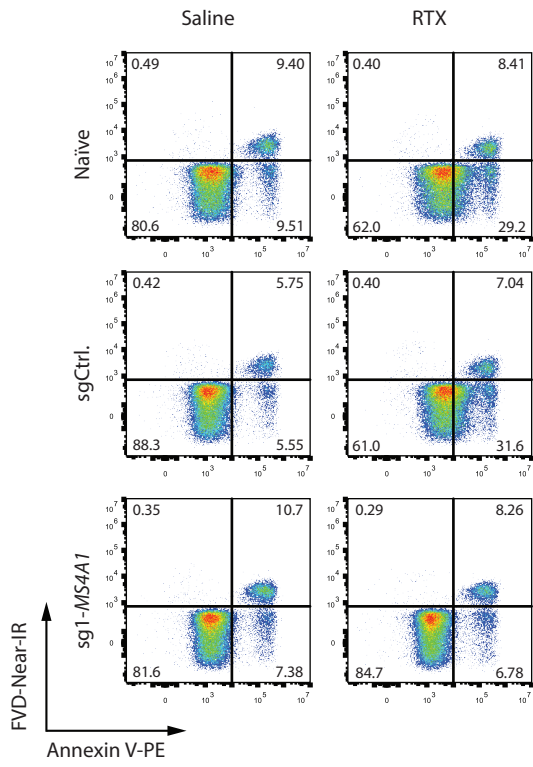

B

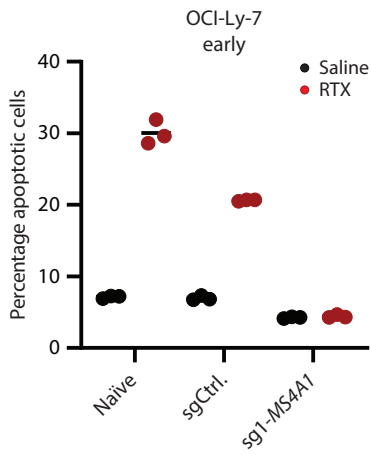

C

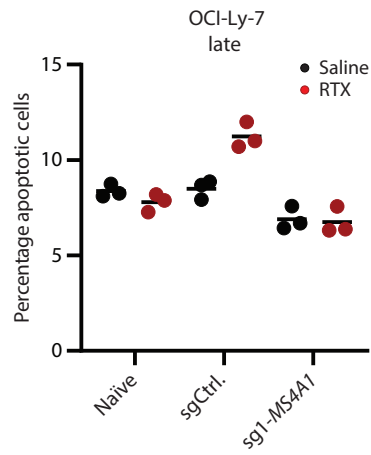



Supplemental figure S9

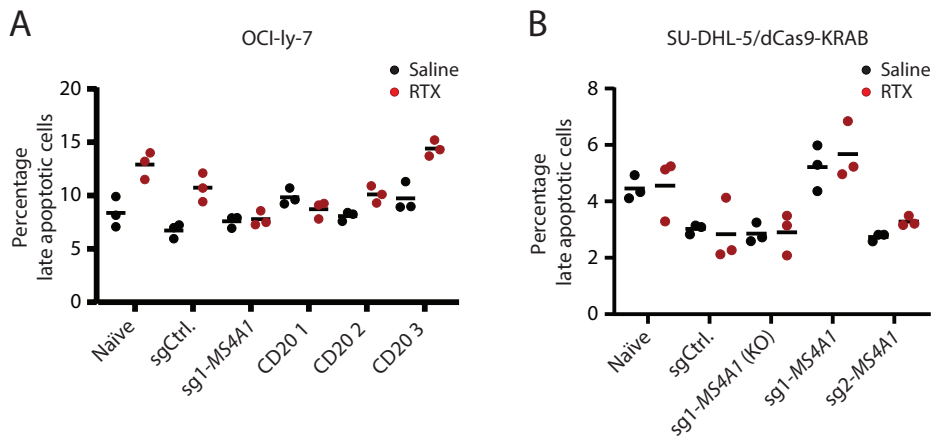

Supplemental figure S10

A

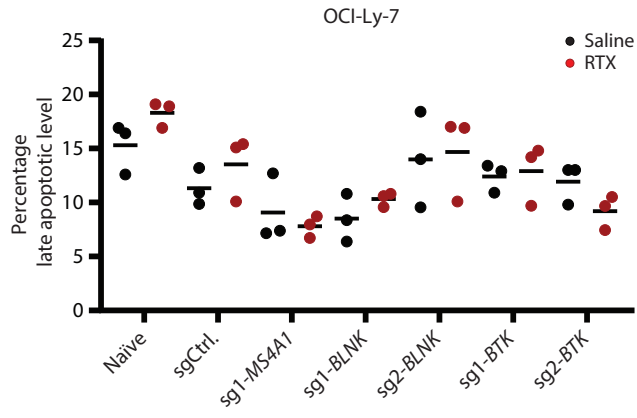

B

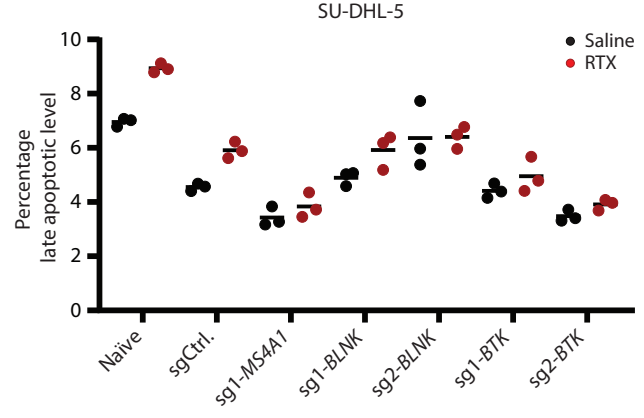

Supplemental figure S11

A

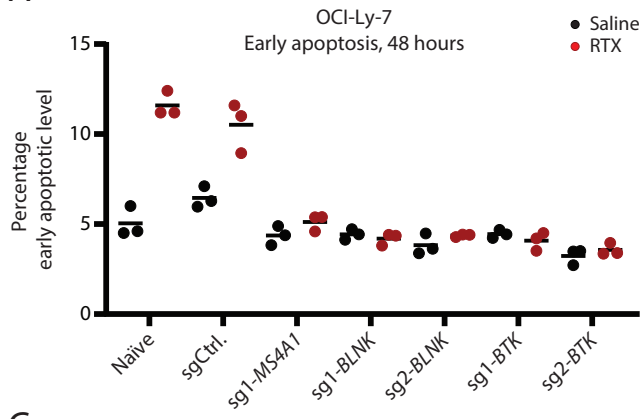

B

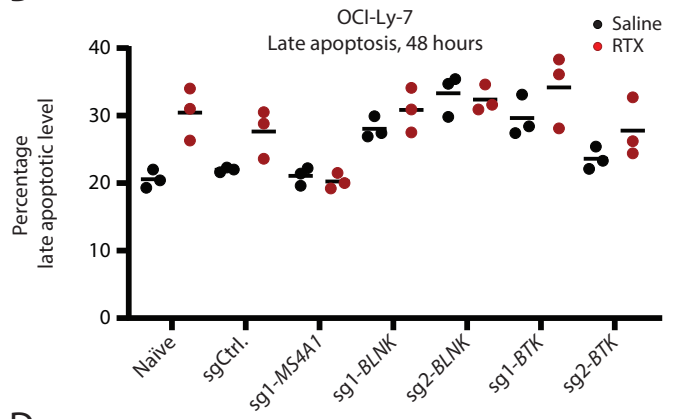

C

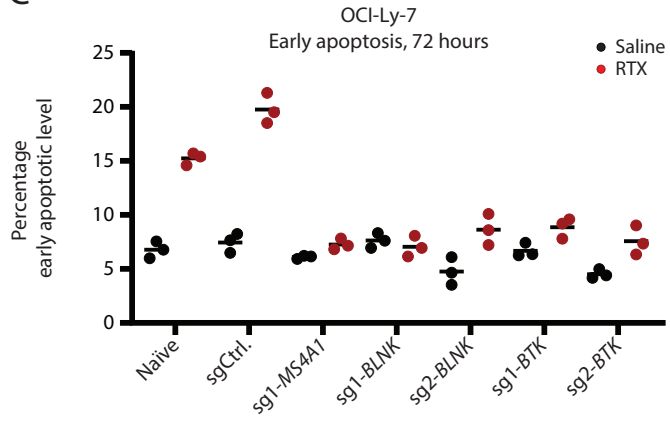

D

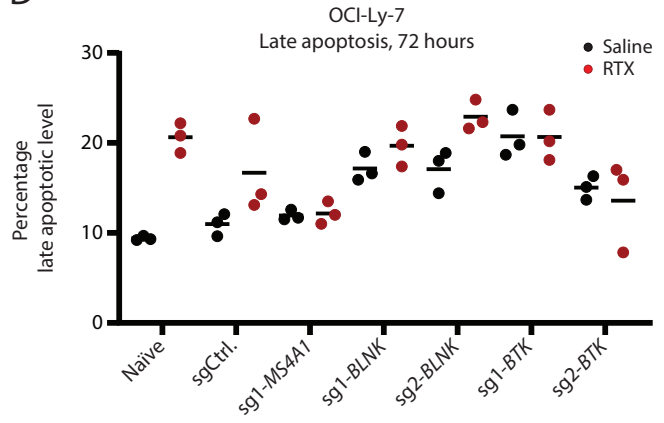

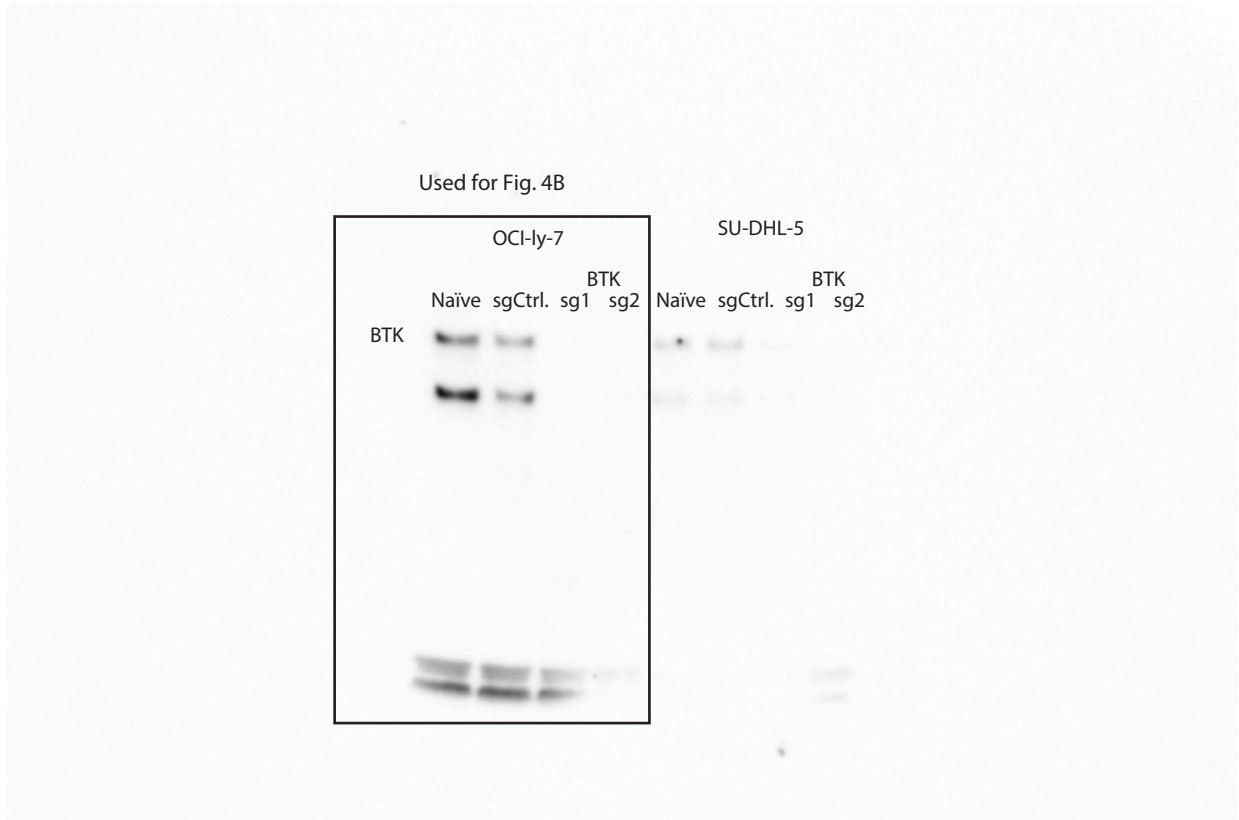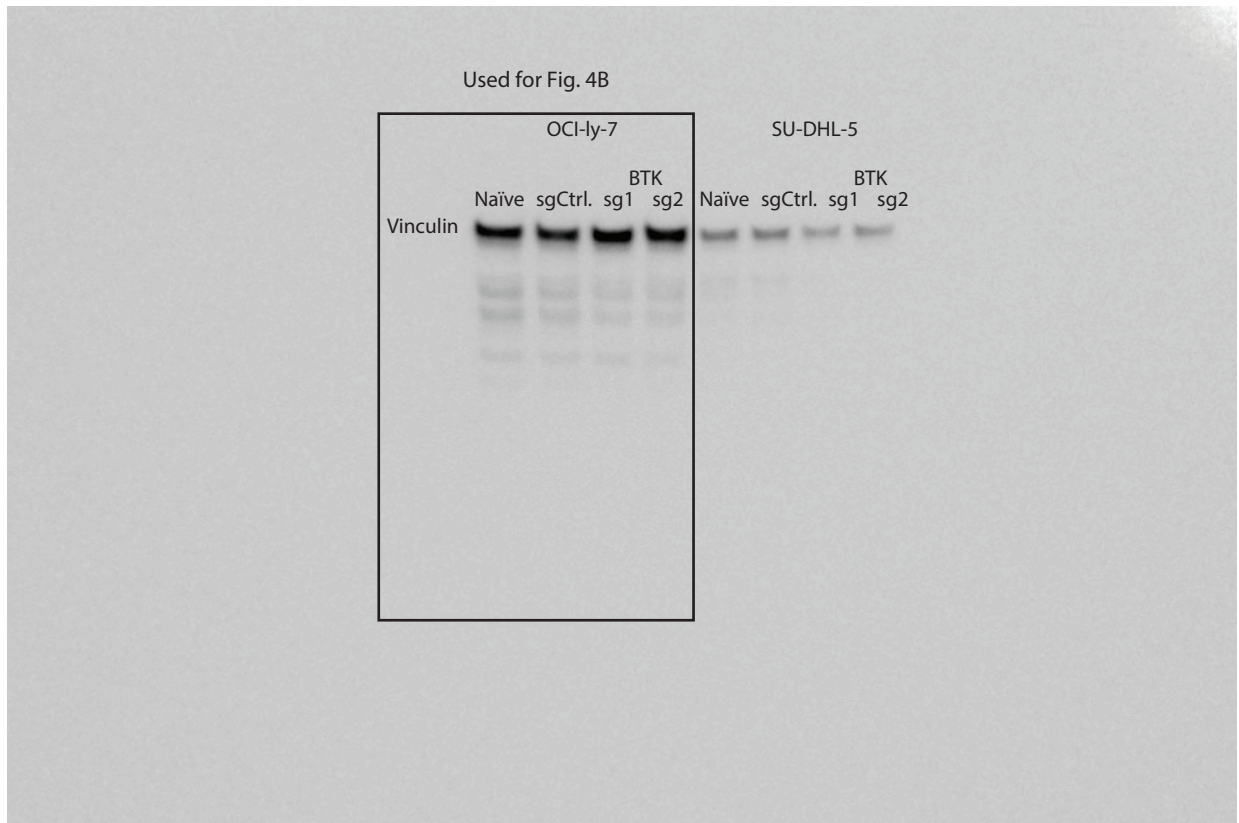

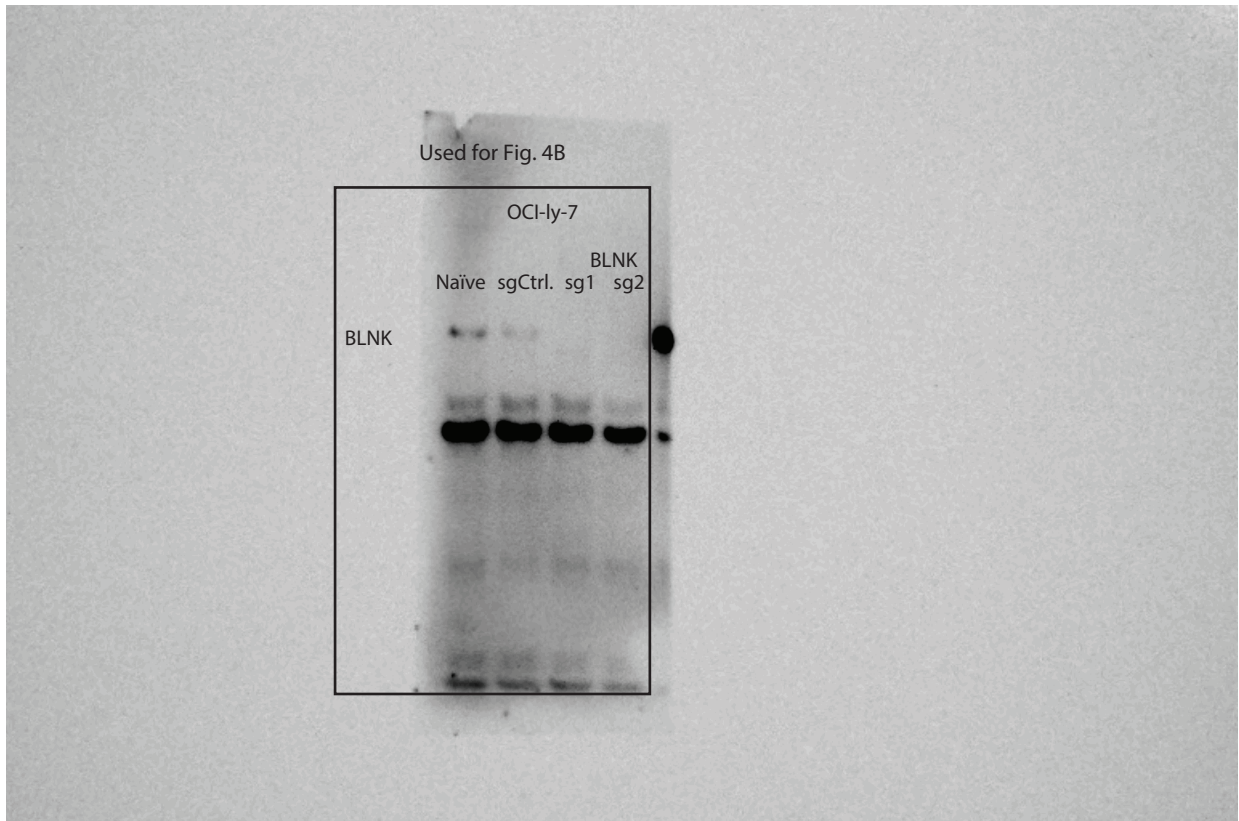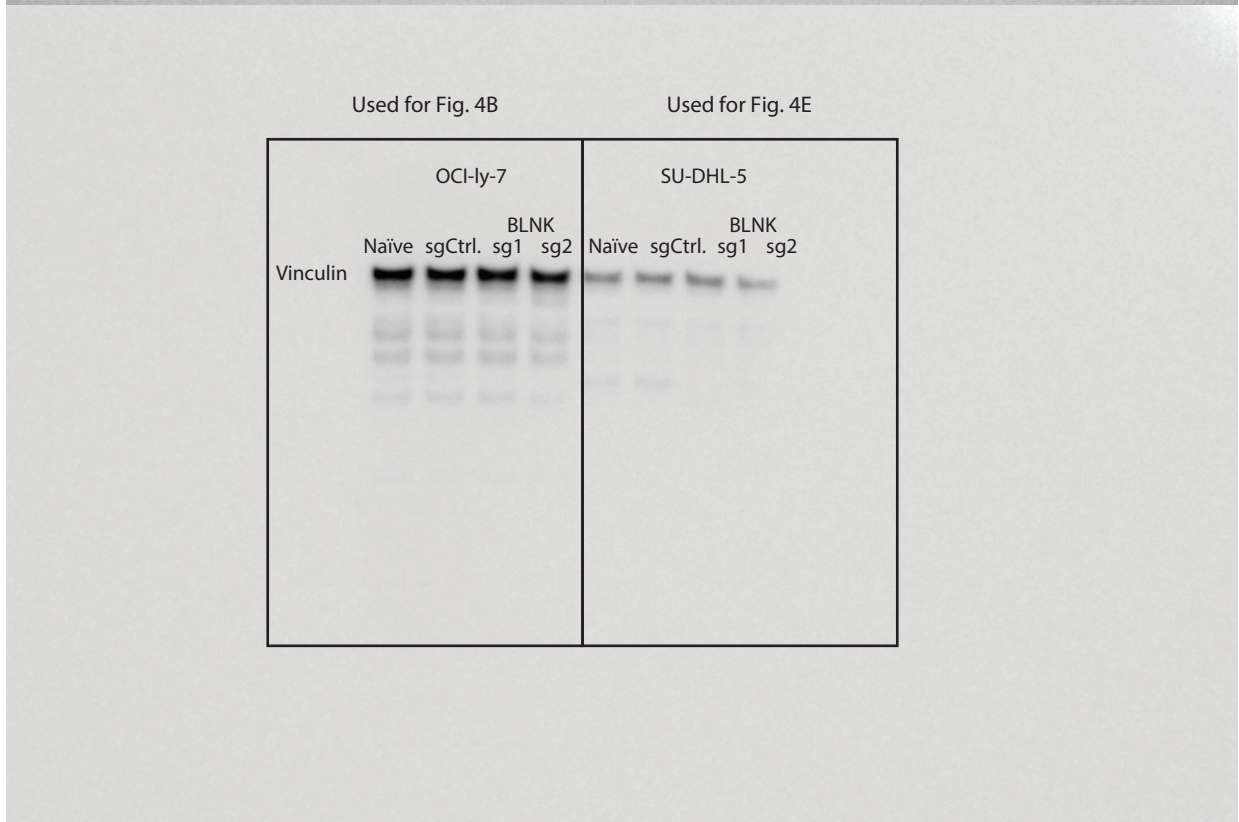

Uncropped western blot membranes

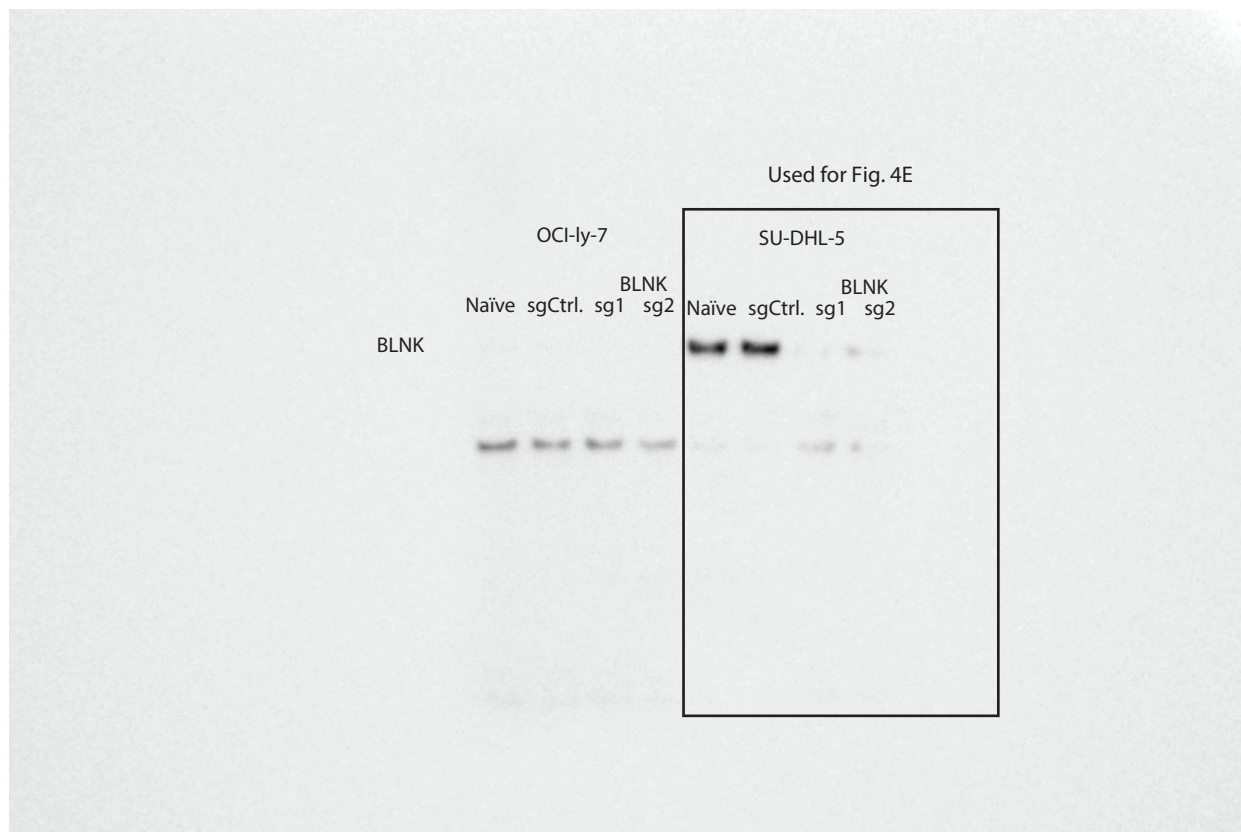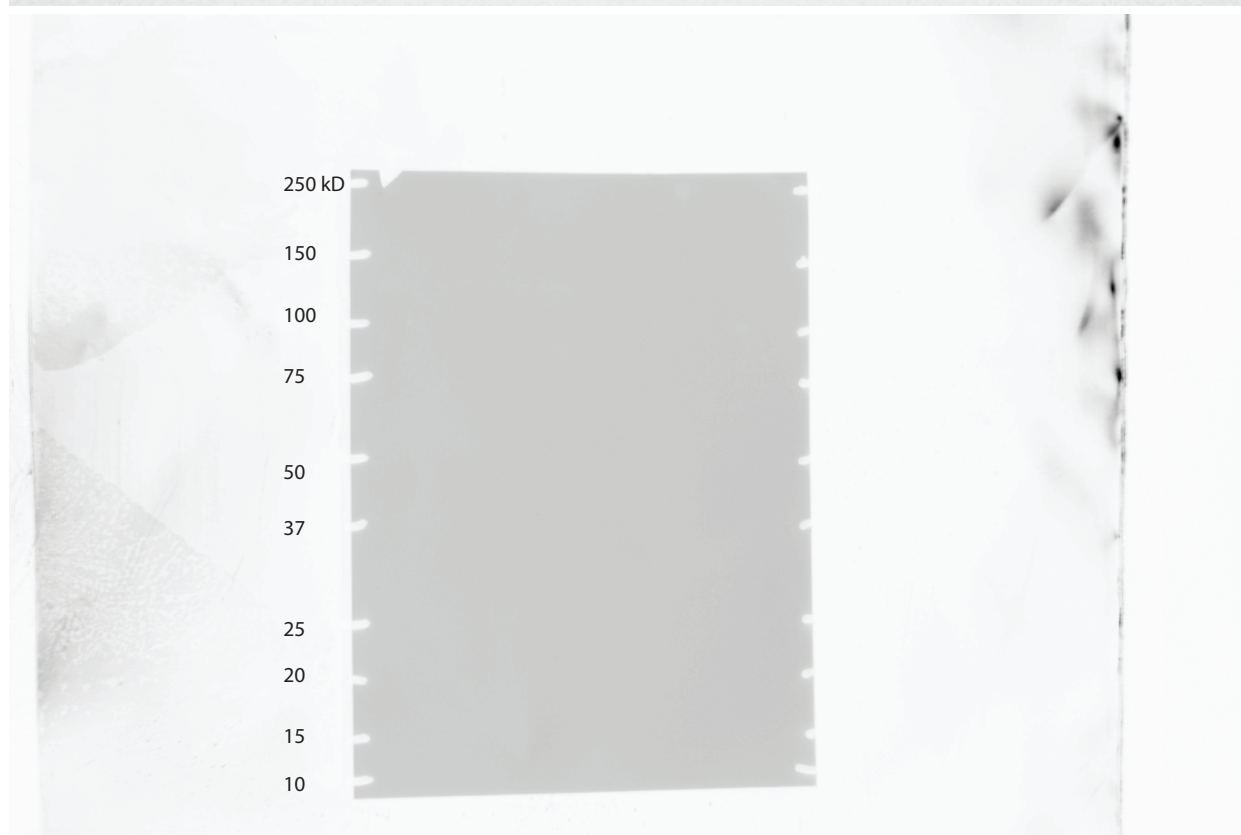

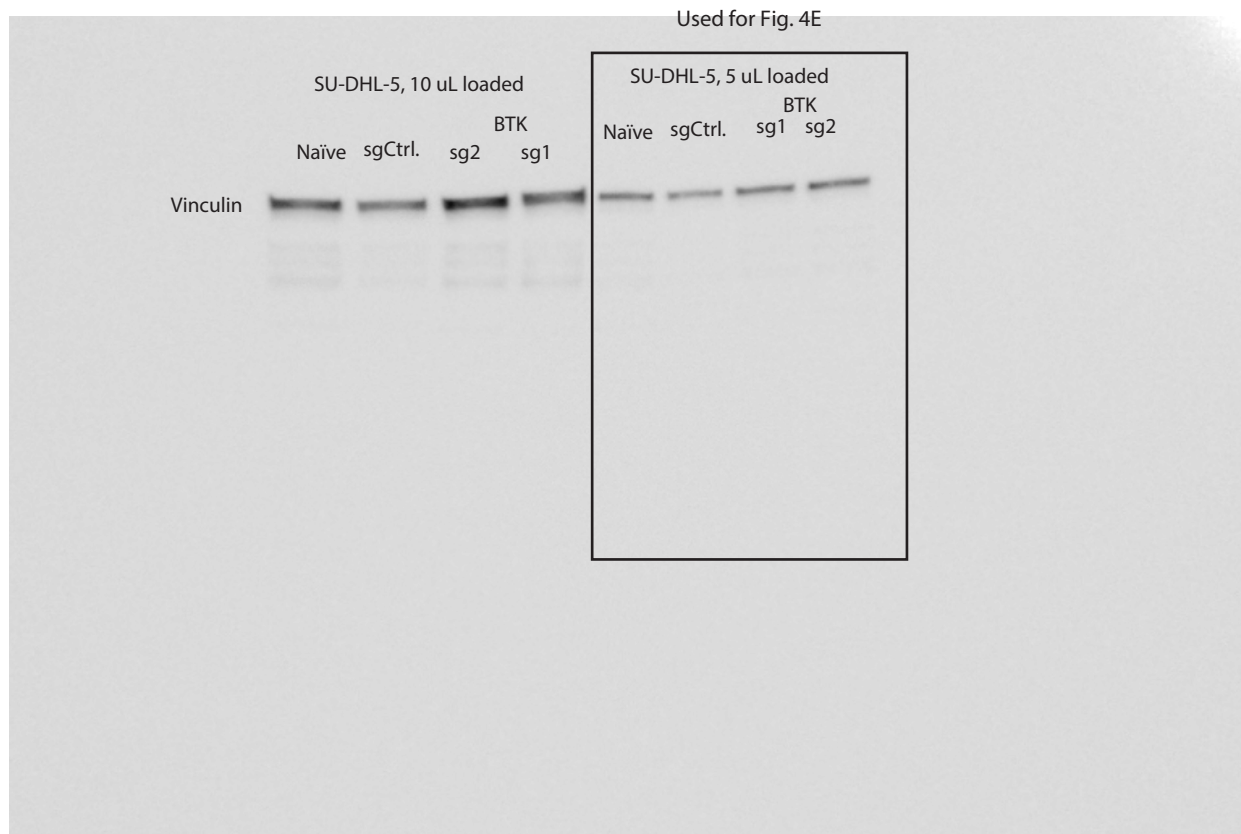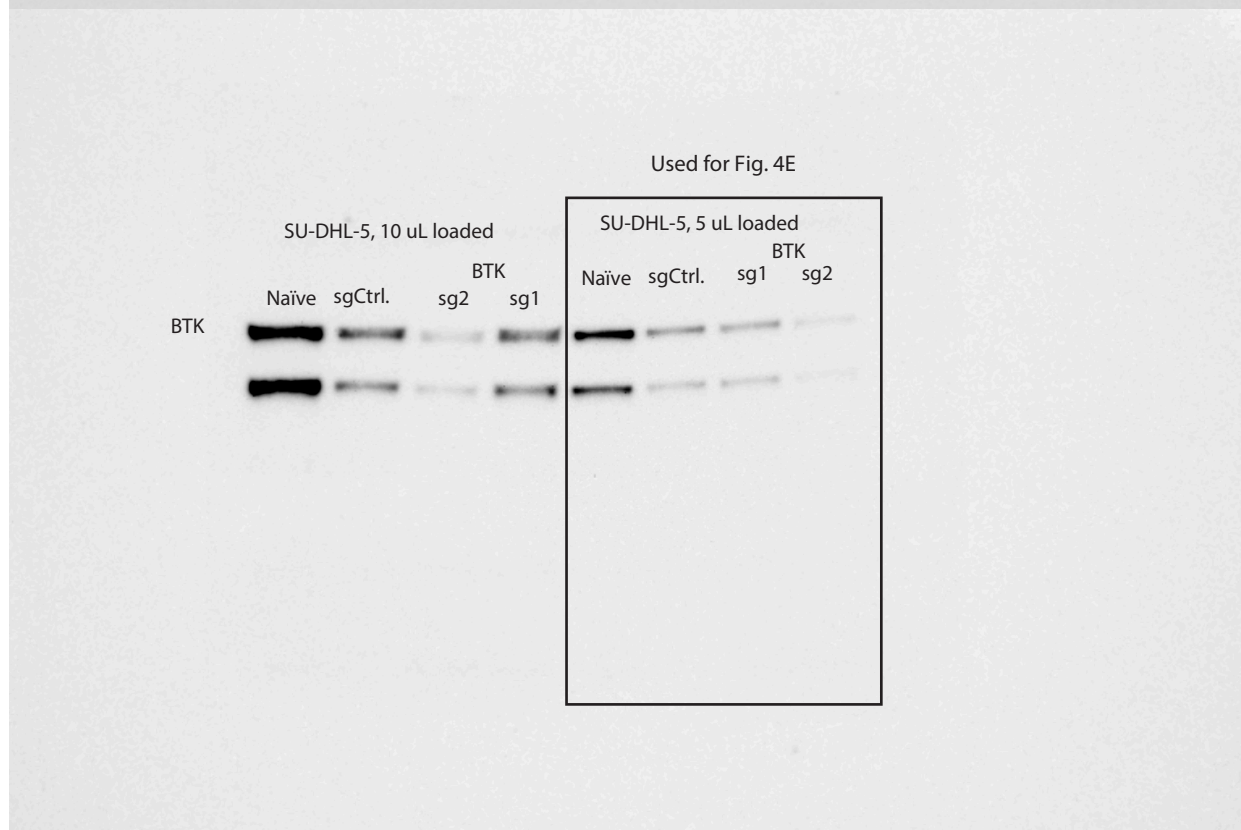

Uncropped western blot membranes

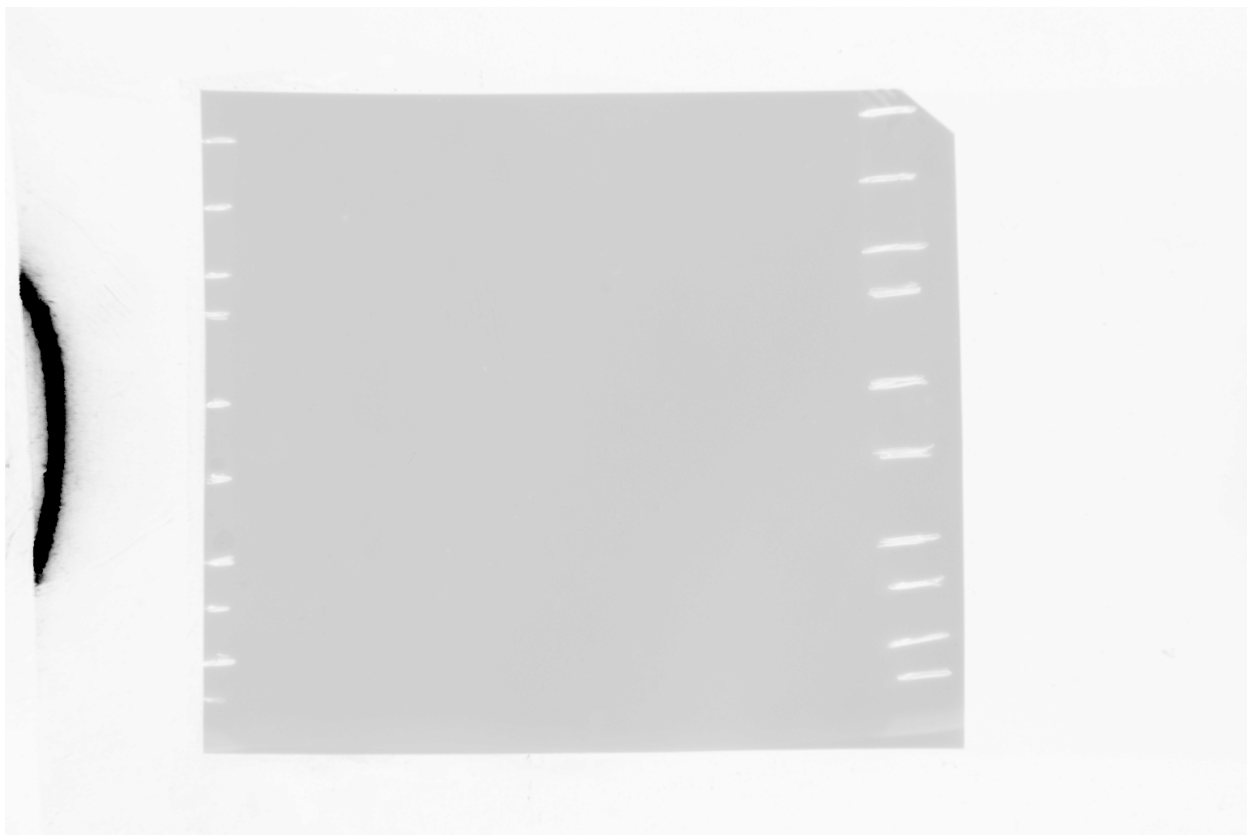

Supplement: MOL2-14-1978-s001.pdf [file MOL2-14-1978-s001.pdf]
